# Supplementary material for: Cause of death among patients with colorectal cancer: a population-based study in the United States
Source: publisher site journal article supplement (doi:10.18632/aging.104022), 2020-11-28
Supplement: Supplementary file [file aging-v12i22-104022-supplementary-material-SD1.pdf]

## SUPPLEMENTARY TABLES

**Supplementary Table 1. Metastatic status of patients diagnosed with colorectal cancer between 2010 and 2016 in SEER 18 registries.**

| Characteristics  | No. of patients (%) | Person-years of follow-up | No. of deaths (%) | Non-cancer deaths          |                           |
|------------------|---------------------|---------------------------|-------------------|----------------------------|---------------------------|
|                  |                     |                           |                   | No. of observed deaths (%) | SMR <sup>1</sup> (95% CI) |
| Liver metastasis |                     |                           |                   |                            |                           |
| Yes              | 30,689 (14.8%)      | 36,149                    | 22,352 (34.2%)    | 1,274 (8.5%)               | 2.85 (2.70-3.02)          |
| No               | 177,070 (85.2%)     | 469,716                   | 42,957 (65.8%)    | 13,727 (91.5%)             | 1.61 (1.58-1.63)          |
| Lung metastasis  |                     |                           |                   |                            |                           |
| Yes              | 10,407 (5.0%)       | 10,549                    | 7,925 (12.3%)     | 430 (2.9%)                 | 2.92 (2.66-3.21)          |
| No               | 196,513 (95.0%)     | 494,709                   | 56,664 (87.7%)    | 14,537 (97.1%)             | 1.65 (1.62-1.67)          |
| Bone metastasis  |                     |                           |                   |                            |                           |
| Yes              | 2,489 (1.2%)        | 1,781                     | 2,050 (3.1%)      | 92 (0.6%)                  | 4.06 (3.31-4.98)          |
| No               | 204,461 (98.8%)     | 503,430                   | 62,541 (95.5%)    | 14,855 (99.4%)             | 1.66 (1.63-1.68)          |
| Brain metastasis |                     |                           |                   |                            |                           |
| Yes              | 576 (0.3%)          | 368                       | 487 (0.8%)        | 27 (0.2%)                  | 7.07 (4.85-10.3)          |
| No               | 206,283 (99.7%)     | 504,728                   | 64,042 (99.2%)    | 14,927 (99.8%)             | 1.66 (1.64-1.69)          |

**Supplementary Table 2. Cancer-related deaths by liver metastasis in patients diagnosed with colorectal cancer between 2010 and 2016 in SEER 18 registries.**

| Cancer-related cause of death                | Liver metastasis |       |        |        |
|----------------------------------------------|------------------|-------|--------|--------|
|                                              | Yes              |       | No     |        |
|                                              | Number           | %     | Number | %      |
| Total                                        | 21,078           | 100%  | 29,230 | 100%   |
| Colon and rectum                             | 19,413           | 92.1% | 25,581 | 87.5%  |
| Other cancers                                | 1,665            | 7.90% | 3,649  | 12.48% |
| Lung and bronchus                            | 160              | 0.76% | 773    | 2.64%  |
| Pancreas                                     | 63               | 0.30% | 253    | 0.87%  |
| In situ, benign or unknown behavior neoplasm | 56               | 0.27% | 152    | 0.52%  |
| Liver                                        | 214              | 1.02% | 133    | 0.46%  |
| Other less frequent cancers                  | 1,172            | 5.56% | 2,338  | 8.00%  |

**Supplementary Table 3. Cancer-related deaths by lung metastasis in patients diagnosed with colorectal cancer between 2010 and 2016 in SEER 18 registries.**

| Cancer-related cause of death                | Lung metastasis |       |        |       |
|----------------------------------------------|-----------------|-------|--------|-------|
|                                              | Yes             |       | No     |       |
|                                              | Number          | %     | Number | %     |
| Total                                        | 7,495           | 100%  | 42,127 | 100%  |
| Colon and rectum                             | 6,829           | 91.1% | 37,564 | 89.2% |
| Other cancers                                | 666             | 8.9%  | 4,563  | 10.8% |
| Lung and Bronchus                            | 154             | 2.1%  | 777    | 1.8%  |
| Liver                                        | 39              | 0.5%  | 297    | 0.7%  |
| Pancreas                                     | 23              | 0.3%  | 288    | 0.7%  |
| Other Digestive Organs                       | 20              | 0.3%  | 190    | 0.5%  |
| Anus                                         | 19              | 0.3%  | 121    | 0.3%  |
| In situ, benign or unknown behavior neoplasm | 13              | 0.2%  | 195    | 0.5%  |
| Other less frequent cancers                  | 398             | 5.3%  | 2,695  | 6.4%  |
